# Supplementary material for: Endosialin defines human stem Leydig cells with regenerative potential
Source: PubMed Central journal article supplement — Hum Reprod. 2020 Sep 20;35(10):2197–212. doi: 10.1093/humrep/deaa174 (PMC7518712; doi:10.1093/humrep/deaa174), 2020-09-20
Supplement: deaa174_supplementary_figure_1.pdf [file deaa174_supplementary_figure_1.pdf]

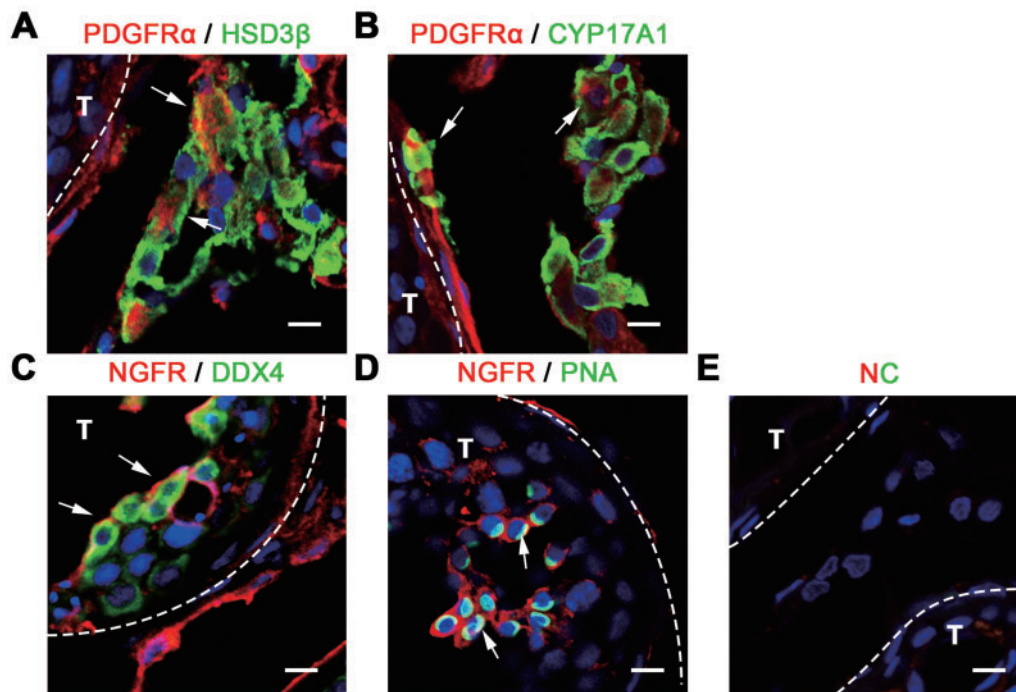

**Supplementary Figure S1. Immunofluorescence detection of PDGFR $\alpha$  and NGFR in human testis tissue.** (A, B) PDGFR $\alpha$  was co-expressed with the LCs lineage markers HSD3 $\beta$  (A) and CYP17A1 (B), as indicated by the arrows. (C, D) Immunofluorescence analyses showed that NGFR was co-expressed with the spermatogenic markers DDX4 (C) and PNA (D) in human testes, as indicated by the arrows. (E) The negative control stained in the absence of the primary antibodies is shown. Ts and interstitium were indicated by dotted lines. The scale bars denote 10  $\mu$ m. The images are representative of results obtained from patient samples ( $n=3$ ). CYP17A1, cytochrome P450 family 17 subfamily A member 1; DDX4, DEAD-box helicase 4; HSD3 $\beta$ , hydroxysteroid dehydrogenase 3 $\beta$ ; LCs, Leydig cells; NC, negative control; NGFR, nerve growth factor receptor; PDGFR $\alpha$ , platelet-derived growth factor receptor  $\alpha$ ; PNA, peanut agglutinin; T, seminiferous tubules.
