# Supplementary material for: Endosialin defines human stem Leydig cells with regenerative potential
Source: PubMed Central journal article supplement — Hum Reprod. 2020 Sep 20;35(10):2197–212. doi: 10.1093/humrep/deaa174 (PMC7518712; doi:10.1093/humrep/deaa174), 2020-09-20
Supplement: deaa174_supplementary_figure_2.pdf [file deaa174_supplementary_figure_2.pdf]

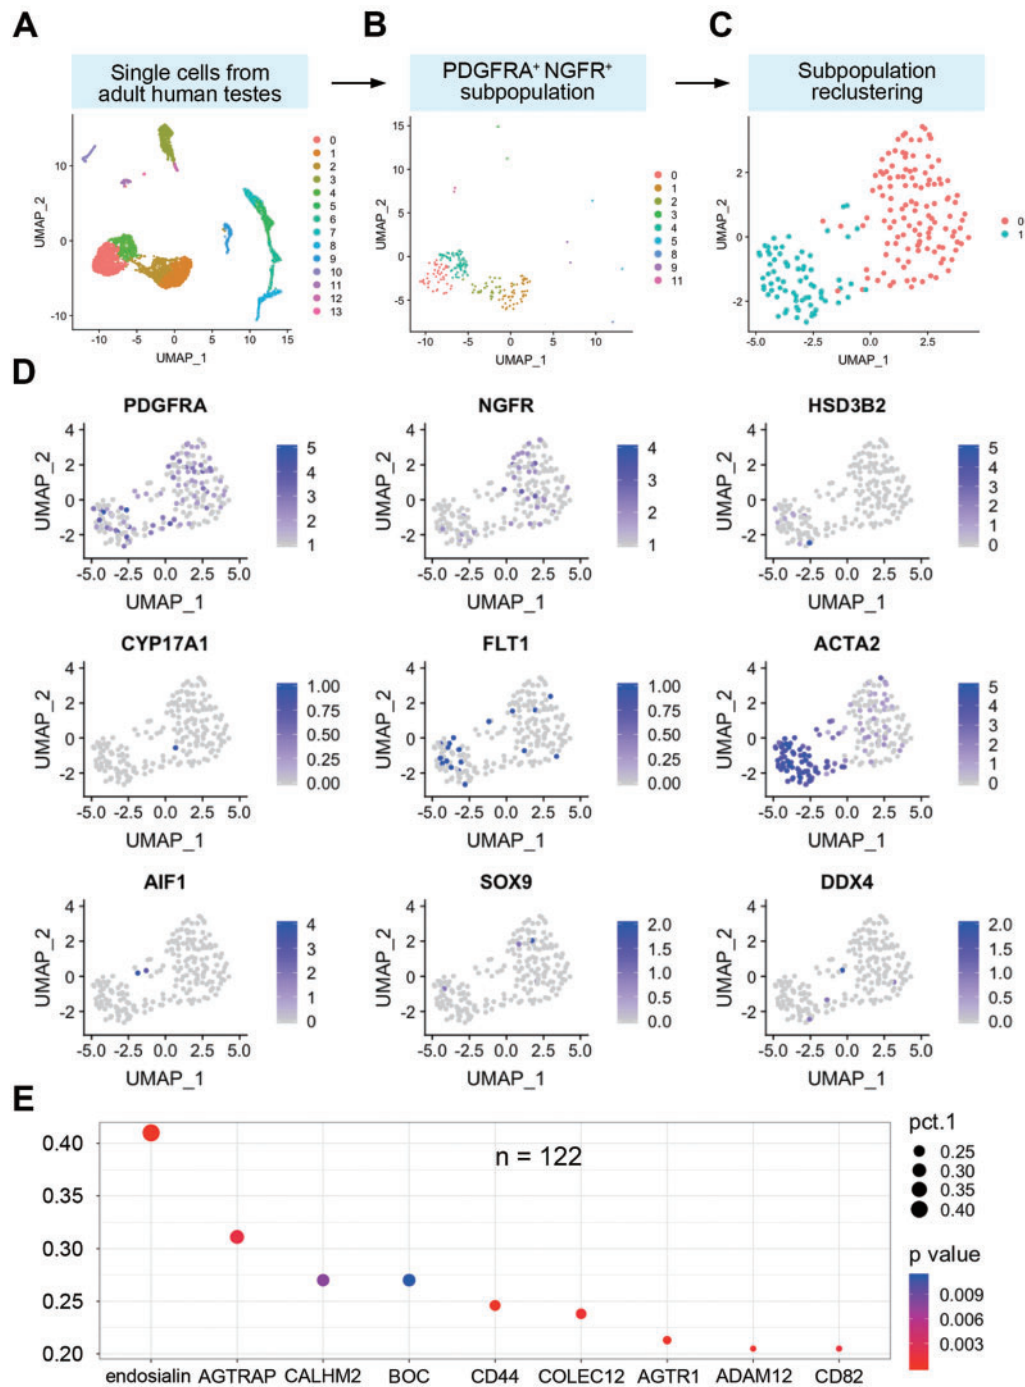

**Supplementary Figure S2. Single-cell analysis of the expression of cell surface marker genes in a putative human SLCs population.** (A) UMAP plot of adult human testis cell clusters defined by scRNA-seq analysis. (B) PDGFRA<sup>+</sup> NGFR<sup>+</sup> subsets were selected from the plot shown in (A). (C) The UMAP plot was generated from the subsets defined in (B) by clustering analysis. (D) The feature plots show the expression patterns of markers (the known SLCs markers PDGFRA and NGFR, the LCs markers HSD3B2 and CYP17A1, the endothelial cell marker FLT1, the myoid cell marker ACTA-2, the macrophage marker AIF1, the Sertoli cell marker SOX9 and the germ cell marker DDX4). Blue indicates high expression, and grey indicates low or no expression, as shown on the figure key. (E) The cell surface marker expression pattern from the differential expression test of cluster 0 shown in (C). The dot colour represents the *P*-value, and the dot size represents the percentage expression. ACTA-2, actin alpha 2; AIF1, allograft inflammatory factor 1; FLT1, fms-related receptor tyrosine kinase 1; scRNA-seq, single-cell RNA sequencing; SLCs, stem Leydig cells; SOX9, SRY-box transcription factor 9; UMAP, uniform manifold approximation and projection.
