# Supplementary material for: Endosialin defines human stem Leydig cells with regenerative potential
Source: PubMed Central journal article supplement — Hum Reprod. 2020 Sep 20;35(10):2197–212. doi: 10.1093/humrep/deaa174 (PMC7518712; doi:10.1093/humrep/deaa174), 2020-09-20
Supplement: deaa174_supplementary_figure_3.pdf [file deaa174_supplementary_figure_3.pdf]

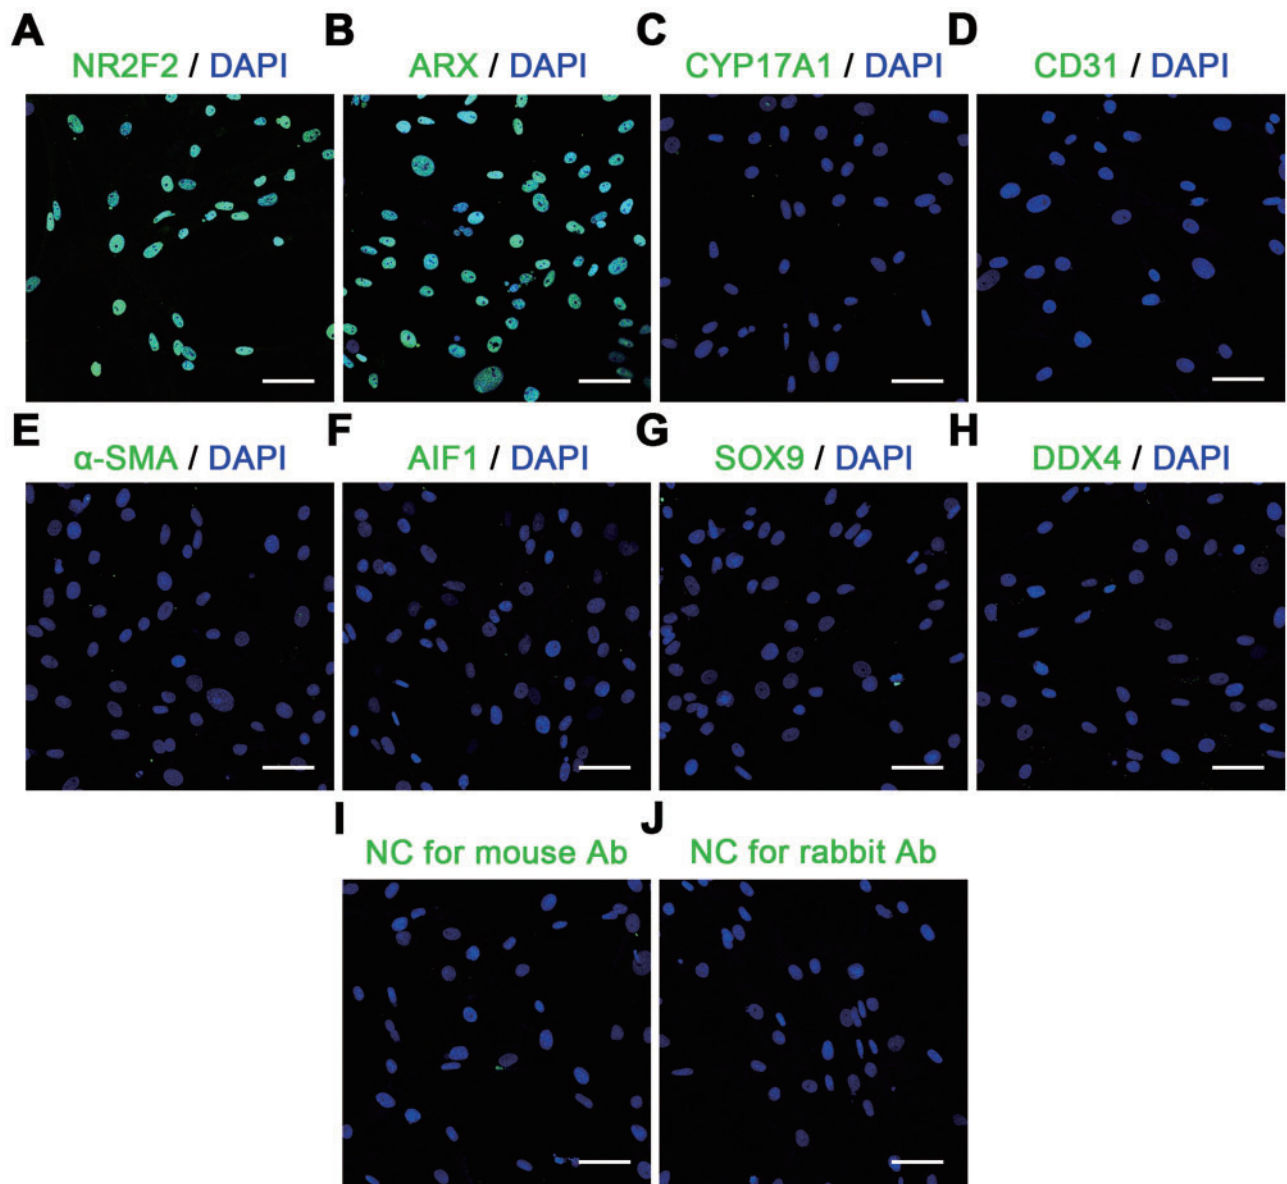

**Supplementary Figure S3. Immunofluorescence analysis of sorted endosialin<sup>+</sup> cells at the primary passage.** (A, B) Immunofluorescence analyses showed that the isolated endosialin<sup>+</sup> cells expressed the transcription factors NR2F2 (A) and ARX (B). (C–H) The sorted endosialin<sup>+</sup> cells were negative for the LCs marker CYP17A1 (C), the endothelial cell marker CD31 (D), the myoid cell marker  $\alpha$ -SMA (E), the macrophage marker AIF1 (F), the Sertoli cell marker SOX9 (G) and the germ cell marker DDX4 (H). The nuclei were counterstained with DAPI (n = 3). NC stained in the absence of the primary antibody. The scale bars denote 50  $\mu$ m. ARX, aristaless-related homeobox; NR2F2, nuclear receptor subfamily 2 group F member 2;  $\alpha$ -SMA, alpha-smooth muscle actin.
