# Supplementary material for: Endosialin defines human stem Leydig cells with regenerative potential
Source: PubMed Central journal article supplement — Hum Reprod. 2020 Sep 20;35(10):2197–212. doi: 10.1093/humrep/deaa174 (PMC7518712; doi:10.1093/humrep/deaa174), 2020-09-20
Supplement: deaa174_supplementary_figure_4.pdf [file deaa174_supplementary_figure_4.pdf]

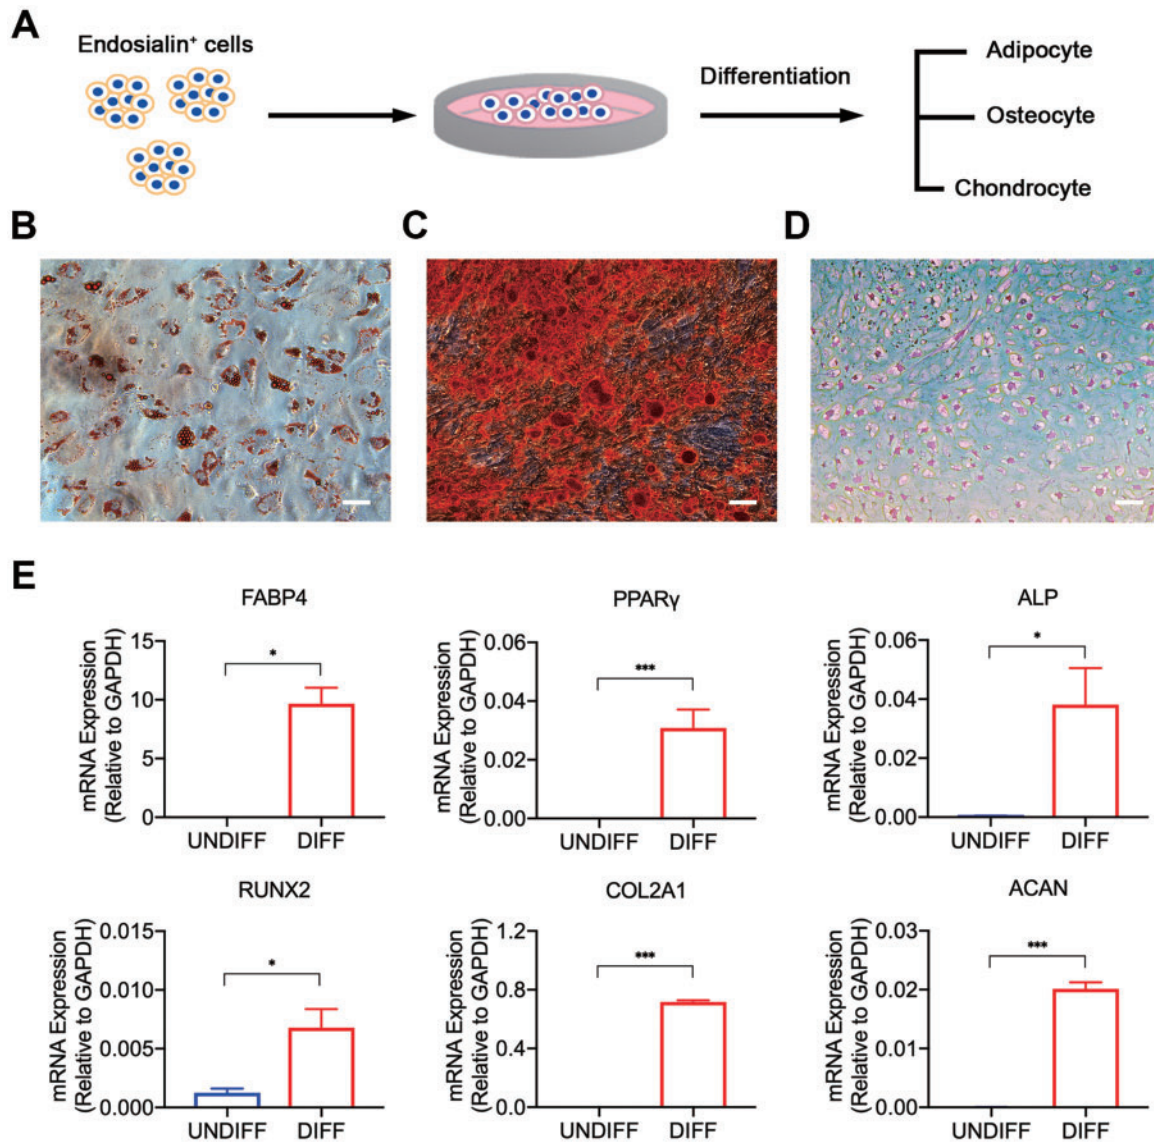

**Supplementary Figure S4. Multi-lineage differentiation capacity of endosialin<sup>+</sup> cells *in vitro*.** (A) Schematic of the experimental procedure used to induce multi-lineage differentiation. (B–D) Representative images showing the potential of endosialin<sup>+</sup> cells to differentiate into adipocytes (Oil Red O), osteocytes (Alizarin Red S) and chondrocytes (Alcian blue) (n = 3). The scale bars denote 50  $\mu$ m. (E) Quantitative RT-PCR analysis was used to detect the adipogenic markers FABP4 and PPAR $\gamma$ , the osteogenic markers ALP and RUNX2 and the chondrogenic markers COL2A1 and ACAN in undifferentiated and DIFF. The data are expressed as the mean  $\pm$  SEM (n = 3). \*\*P < 0.001, \*\*\*P < 0.001. ACAN, aggrecan; ALP, alkaline phosphatase; COL2A1, collagen type 2 alpha 1 chain; DIFF, differentiated endosialin<sup>+</sup> cells; FABP4, fatty acid-binding protein 4; PPAR $\gamma$ , peroxisome proliferator-activated receptor- $\gamma$ ; RUNX2, runt-related transcription factor 2; UNDIFF, undifferentiated endosialin<sup>+</sup> cells.
