# Supplementary material for: Endosialin defines human stem Leydig cells with regenerative potential
Source: PubMed Central journal article supplement — Hum Reprod. 2020 Sep 20;35(10):2197–212. doi: 10.1093/humrep/deaa174 (PMC7518712; doi:10.1093/humrep/deaa174), 2020-09-20
Supplement: deaa174_supplementary_figure_5.pdf [file deaa174_supplementary_figure_5.pdf]

**A**

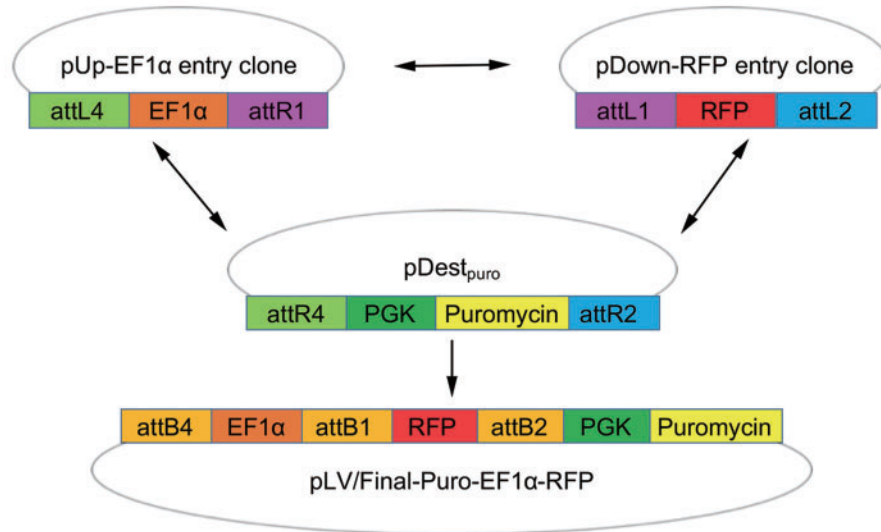

**B**

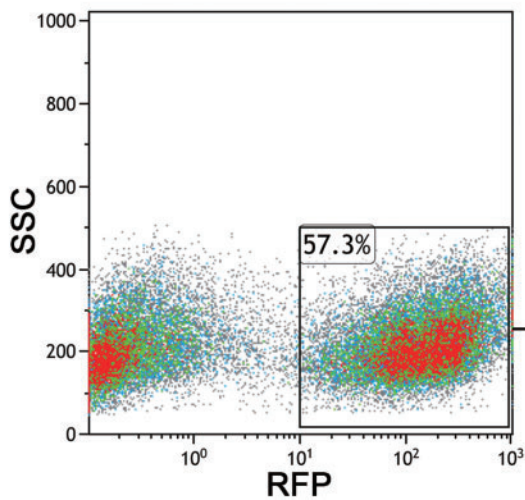

**C**

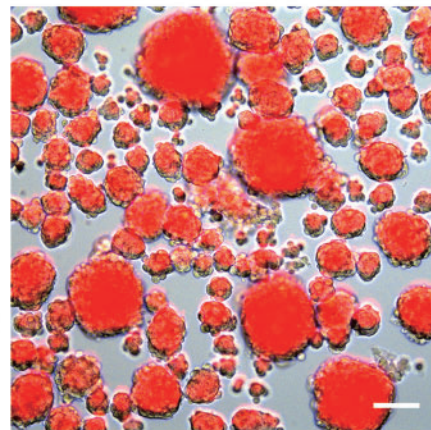

**Supplementary Figure S5. Transduction of endosialin<sup>+</sup> cells by an RFP-expressing lentivirus.** (A) Schematic diagram showing the construction of the pLV/Final-Puro-EF1 $\alpha$ -RFP vector. (B) Purification of RFP<sup>+</sup> cells by FACS. (C) Representative images showing that the sorted RFP-labelled endosialin<sup>+</sup> cells propagated into floating clonal spheres in the expansion medium. The scale bar denotes 100  $\mu$ m. FACS, fluorescence-activated cell sorting; RFP, red fluorescent protein.
