# Supplementary material for: Endosialin defines human stem Leydig cells with regenerative potential
Source: PubMed Central journal article supplement — Hum Reprod. 2020 Sep 20;35(10):2197–212. doi: 10.1093/humrep/deaa174 (PMC7518712; doi:10.1093/humrep/deaa174), 2020-09-20
Supplement: deaa174_supplementary_figure_6.pdf [file deaa174_supplementary_figure_6.pdf]

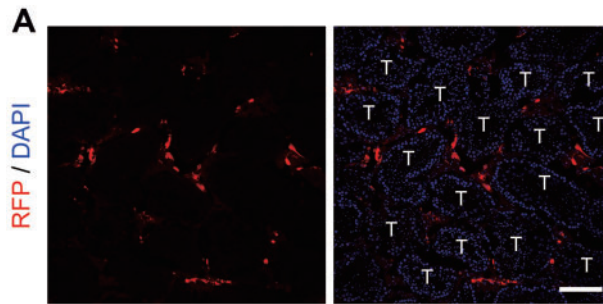

**Supplementary Figure S6. Localization of transplanted endosialin<sup>+</sup> cells in the testes of recipient mice.** (A) Immunostaining showed the accumulation of RFP<sup>+</sup> cells in the testicular interstitium of recipient mice at 4 weeks after transplantation (n = 3). The nuclei were counterstained with DAPI. The scale bar denotes 100  $\mu$ m.
