# Supplementary material for: Endosialin defines human stem Leydig cells with regenerative potential
Source: PubMed Central journal article supplement — Hum Reprod. 2020 Sep 20;35(10):2197–212. doi: 10.1093/humrep/deaa174 (PMC7518712; doi:10.1093/humrep/deaa174), 2020-09-20
Supplement: deaa174_supplementary_figure_7.pdf [file deaa174_supplementary_figure_7.pdf]

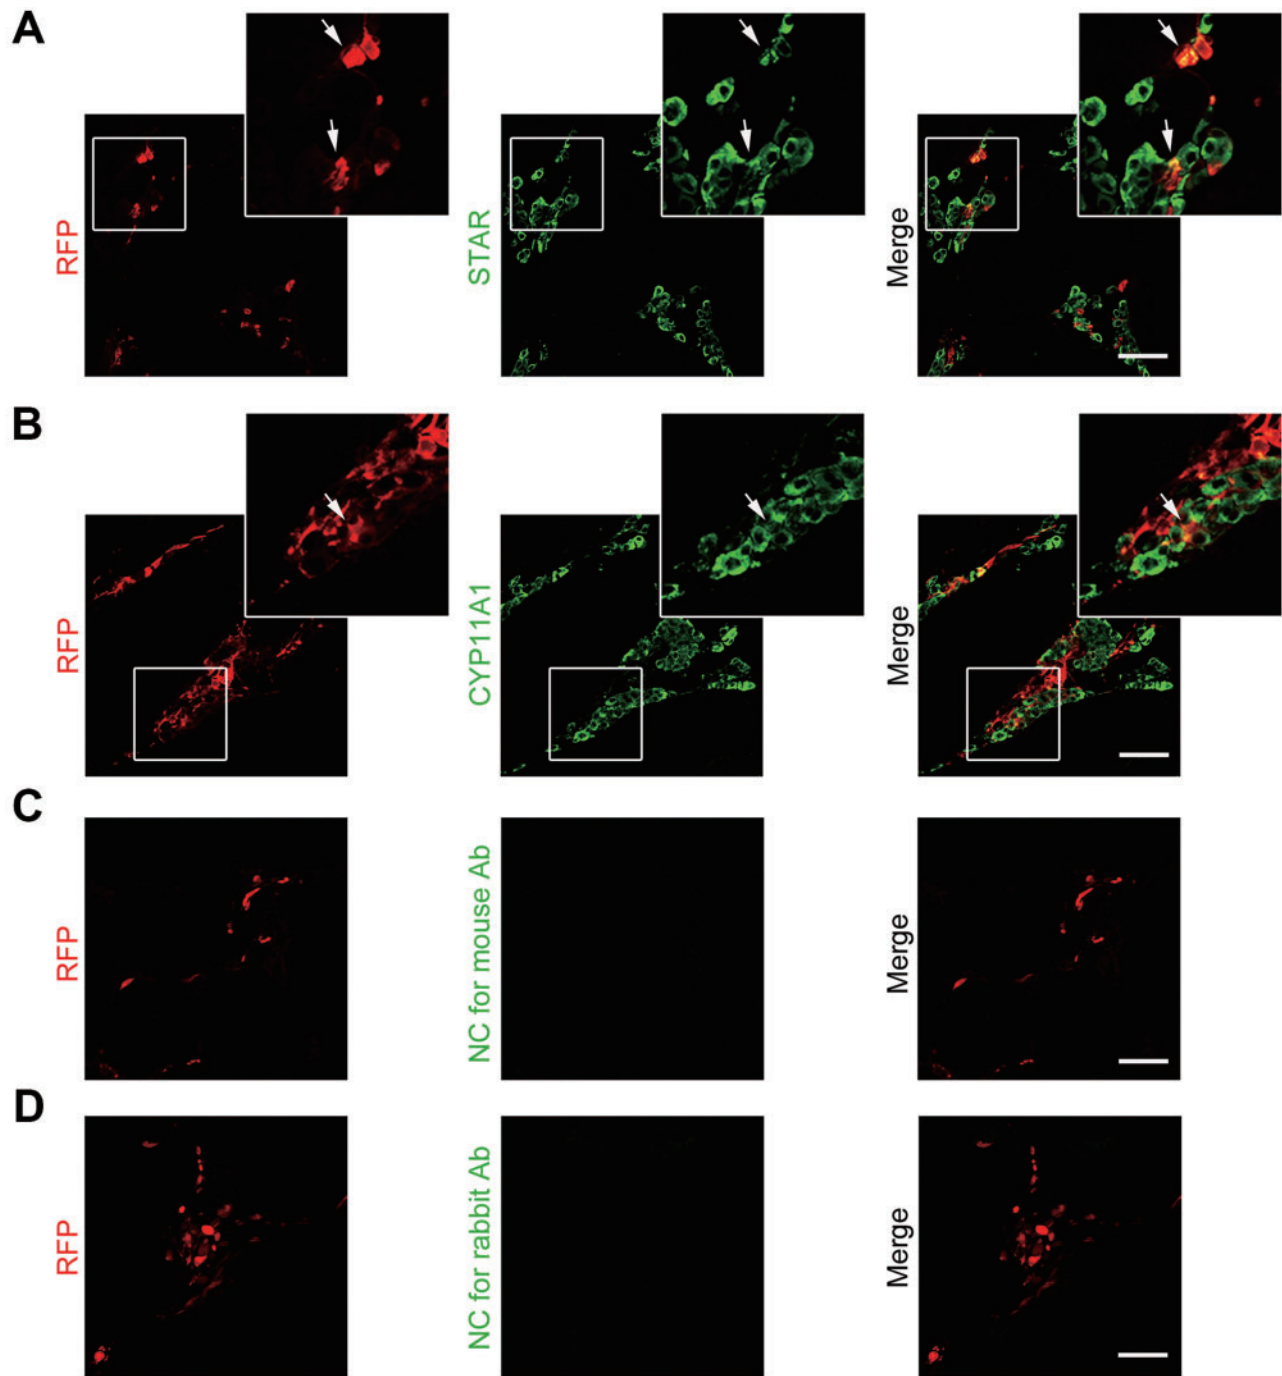

**Supplementary Figure S7. Differentiation of the transplanted endosialin<sup>+</sup> cells in the testes of mice.** (A, B) RFP-labelled endosialin<sup>+</sup> cells transplanted into the testes of NCG mice were assessed 4 weeks after transplantation. Immunostaining showed that a portion of the transplanted cells differentiated into STAR<sup>+</sup> (A) and CYP11A1<sup>+</sup> LCs (B) (indicated by arrows). (C) The negative control stained in the absence of the primary antibodies is shown. The scale bars denote 50  $\mu$ m. The nuclei were counterstained with DAPI. Representative images obtained from recipient mice are shown (n = 3). CYP11A1, cytochrome P450 family 11 subfamily A member 1; NCG, NOD-Prkdc<sup>em26Cd52</sup>Il2rg<sup>em26Cd22</sup>/Nju; STAR, steroidogenic acute regulatory protein.
