# Supplementary material for: Endosialin defines human stem Leydig cells with regenerative potential
Source: PubMed Central journal article supplement — Hum Reprod. 2020 Sep 20;35(10):2197–212. doi: 10.1093/humrep/deaa174 (PMC7518712; doi:10.1093/humrep/deaa174), 2020-09-20
Supplement: deaa174_supplementary_table_i.pdf [file deaa174_supplementary_table_i.pdf]

**Supplementary Table S1 Primers used to amplify the transcripts during quantitative real-time PCR analysis.**

| Gene           | Forward primer 5' to 3' | Reverse primer 5' to 3'  |
|----------------|-------------------------|--------------------------|
| Endosialin     | ACAGATGAGTGCCAGATT      | TCCCTCGCTACAATAACA       |
| PDGFR $\alpha$ | CGTGCTAAGGAAGAAGAC      | CAGAATGGATGAAGGAACT      |
| NGFR           | AACCTCATCCCTGTCTAT      | CCTCTTGAAGGCTATGTAG      |
| Nestin         | GAAGAGGACCAGAGTATT      | TTCAAGAGTTCTCAATGTC      |
| LHCGR          | CAGCCACTGCTGTGCTTTTA    | CACTCTCAGCAAGCATGGAA     |
| SF-1           | GAGAGCCAGAGCTGCAAGAT    | CTTGACATCGGCCCAAAC       |
| STAR           | AAGAGGGCTGGAAGAAGGAG    | TCTCCTTGACATTGGGGTTC     |
| HSD3 $\beta$   | GCCTGTTGGTGAAGAGAAG     | GCAGGCTCTTTTCAGGAATG     |
| FABP4          | ACTGGGCCAGGAATTTGACG    | CTCGTGGAAGTGACGCCTT      |
| PPAR $\gamma$  | AGGAGCAGAGCAAAGAGG      | TTGGTCGTTCAAGTCAAGAT     |
| ALP            | AGCACTCCCACTTCATCTGGAA  | GAGACCAATAGGTAGTCCACATTG |
| RUNX2          | AGAAGGCACAGACAGAAGCTTGA | AGGAATGCGCCCTAAATCACT    |
| COL2A1         | GGCAATAGCAGTTTACGTACA   | CGATAACAGTCTTGCCCCACTT   |
| ACAN           | TGCATTCCACGAAGCTAACCTT  | GACGCCTCGCCTTCTTGAA      |
| GAPDH          | TTGAGGTCAATGAAGGGGTC    | GAAGGTGAAGGTCGGAGTCA     |

ACAN, aggrecan; ALP, alkaline phosphatase; COL2A1, collagen type 2 alpha 1 chain; FABP4, fatty acid-binding protein 4; HSD3 $\beta$ , hydroxysteroid dehydrogenase 3 $\beta$ ; NGFR, nerve growth factor receptor; PDGFR $\alpha$ , platelet-derived growth factor receptor  $\alpha$ ; PPAR $\gamma$ , peroxisome proliferator activated receptor- $\gamma$ ; RUNX2, runt-related transcription factor 2; SF-1, steroidogenic factor 1; STAR, steroidogenic acute regulatory protein.
