# Supplementary material for: Endosialin defines human stem Leydig cells with regenerative potential
Source: PubMed Central journal article supplement — Hum Reprod. 2020 Sep 20;35(10):2197–212. doi: 10.1093/humrep/deaa174 (PMC7518712; doi:10.1093/humrep/deaa174), 2020-09-20
Supplement: deaa174_supplementary_table_ii.pdf [file deaa174_supplementary_table_ii.pdf]

**Supplementary Table SII Primary and secondary antibodies used for immunostaining or flow cytometry.**

| Antibodies                  | Dilution | Distributor           | Lot. no      |
|-----------------------------|----------|-----------------------|--------------|
| Mouse anti-Endosialin       | 1:200    | Millipore (MAB2626)   | 3012258      |
| Rabbit anti-PDGFR $\alpha$  | 1:200    | Abcam (ab203491)      | GR3241185-9  |
| Rabbit anti-NGFR            | 1:500    | Promega (G323A)       | 0000086012   |
| Rabbit anti-Nestin          | 1:500    | Millipore (ABD69)     | 2986140      |
| Rabbit anti-LHCGR           | 1:150    | Novus (NLS1436)       | 39887        |
| Rabbit anti-SF-1            | 1:150    | Abcam (ab65815)       | GR322146-2   |
| Rabbit anti-STAR            | 1:200    | GeneTex (GTX105716)   | 42914        |
| Mouse anti-HSD3 $\beta$     | 1:100    | Santa Cruz (sc515120) | L1416        |
| Rabbit anti-CYP17A1         | 1:200    | GeneTex (GTX56294)    | 821703732    |
| Mouse anti-CYP17A1          | 1:200    | Santa Cruz (sc374244) | L1113        |
| Rabbit anti-CD31            | 1:100    | Arigo (ARG52748)      | 61617        |
| Rabbit anti- $\alpha$ -SMA  | 1:500    | Abcam (5694)          | GR3183259-2  |
| Rabbit anti-AIF1            | 1:500    | GeneTex (GTX100042)   | 41556        |
| Rabbit anti-SOX9            | 1:200    | Millipore (AB5535)    | 3018860      |
| Rabbit anti-DDX4            | 1:500    | CST (8761S)           | 2            |
| Mouse anti-DDX4             | 1:200    | Abcam (ab27591)       | GR3299257-1  |
| Rabbit anti-Ki67            | 1:500    | Arigo (ARG11083)      | 81231        |
| Mouse anti-NR2F2            | 1:200    | Abcam (ab41859)       | GR253380-13  |
| Rabbit anti-CYP11A1         | 1:200    | GeneTex (GTX56293)    | 821705286    |
| Rabbit anti-ARX             | 1:200    | Abcam (ab235060)      | GR3235797-13 |
| Mouse Endosialin-AF647      | 1:50     | BD (564994)           | 8333659      |
| Mouse PDGFR $\alpha$ -BB515 | 1:50     | BD (564594)           | 8275914      |
| Mouse NGFR-PE-Cy7           | 1:50     | BD (562122)           | 7137539      |
| Mouse Nestin-PE-Cy7         | 1:50     | Novus (NB300-266)     | A-15-100119  |
| Goat anti-rabbit IgG AF488  | 1:1000   | Invitrogen (A32731)   | RJ243417     |
| Goat anti-rabbit IgG AF555  | 1:1000   | Invitrogen (A32732)   | SC243839     |
| Goat anti-mouse IgG AF488   | 1:1000   | Invitrogen (A32723)   | SA243833     |
| Goat anti-mouse IgG AF555   | 1:1000   | Invitrogen (A32727)   | SA243834     |

AIF1, allograft inflammatory factor 1; ARX, aristaless related homeobox; CYP11A1, cytochrome P450 family 11 subfamily A member 1; CYP17A1, cytochrome P450 family 17 subfamily A member 1; DDX4, DEAD-box helicase 4; NR2F2, nuclear receptor subfamily 2 group F member 2; SOX9, SRY-box transcription factor 9;  $\alpha$ -SMA, alpha-smooth muscle actin.
